# Supplementary material
Source: PubMed Central journal article supplement (PMC7613250)
Supplement: EMS151239-supplement-Supplementary_Tables.pdf [file EMS151239-supplement-Supplementary_Tables.pdf]

## Supplementary Tables

|                  | For analysis | After quality control |
|------------------|--------------|-----------------------|
| Short-axis image | 26,904       | 26,521 (98.6%)        |
| Long-axis image  | 26,602       | 26,240 (98.6%)        |
| Aortic image     | 26,300       | 25,673 (97.6%)        |

**Supplementary Table 1. Number of subjects with available raw images for analysis and after quality control.** In total, imaging phenotypes were available for 26,893 subjects after quality control.

|                               | Women (n = 13,969) | Men (n = 12,924) |
|-------------------------------|--------------------|------------------|
| Age (year)                    | 62.8 (7.4)         | 64.2 (7.6)       |
| Race (%)                      |                    |                  |
| Caucasian                     | 97.4               | 96.8             |
| Other ethnicities             | 2.4                | 2.9              |
| Unknown                       | 0.2                | 0.4              |
| Weight (kg)                   | 69.2 (13.1)        | 83.9 (13.5)      |
| Height (cm)                   | 162.7 (6.2)        | 176.1 (6.6)      |
| BMI (kg/m <sup>2</sup> )      | 26.2 (4.8)         | 27.0 (3.9)       |
| SBP (mmHg)                    | 133.9 (18.5)       | 140.6 (16.8)     |
| DBP (mmHg)                    | 77.3 (10.0)        | 80.9 (9.8)       |
| Life-style                    |                    |                  |
| Current smoking (%)           | 3.1                | 4.3              |
| Alcohol intake (gram per day) | 13.3 (12.3)        | 26.1 (22.0)      |
| Vigorous PA (days per week)   | 1.8 (1.8)          | 2.2 (1.9)        |
| Self-reported diseases        |                    |                  |
| Hypertension (%)              | 17.9               | 26.4             |
| High cholesterol (%)          | 9.0                | 14.3             |
| Cardiac disease (%)           | 3.9                | 8.8              |
| PVD (%)                       | 0.0                | 0.2              |
| Diabetes (%)                  | 3.1                | 6.3              |
| Stroke (%)                    | 0.8                | 1.3              |
| Asthma (%)                    | 10.1               | 9.3              |
| COPD (%)                      | 0.4                | 0.8              |
| Bronchitis (%)                | 1.8                | 1.8              |
| Parkinson's (%)               | 0.1                | 0.2              |
| Dementia (%)                  | 0.0                | 0.1              |
| Depression (%)                | 9.9                | 5.8              |

**Supplementary Table 2. Basic participant characteristics.** n = 26,893 subjects were analysed. Values are depicted as mean (standard deviation). BMI: body mass index; SBP: systolic blood pressure; DBP: diastolic blood pressure; PA: physical activity; PVD: peripheral vascular disease; COPD: chronic obstructive pulmonary disease.

|                                                           | Women (n = 13,969) | Men (n = 12,924) |
|-----------------------------------------------------------|--------------------|------------------|
| <b>Left ventricle</b>                                     |                    |                  |
| LV end-diastolic volume (mL)                              | 129.5 (22.5)       | 168.8 (32.1)     |
| LV end-systolic volume (mL)                               | 50.5 (12.6)        | 71.5 (19.4)      |
| LV stroke volume (mL)                                     | 79.0 (14.4)        | 97.3 (19.3)      |
| LV ejection fraction (%)                                  | 61.1 (5.6)         | 57.8 (6.1)       |
| LV cardiac output (L/min)                                 | 5.0 (1.1)          | 5.9 (1.3)        |
| LV myocardial mass (g)                                    | 70.9 (12.2)        | 102.9 (18.3)     |
| LV wall thickness (mm)                                    | 5.2 (0.5)          | 6.2 (0.7)        |
| Global peak strain $E_{cc}$ (%)                           | -23.4 (3.0)        | -21.1 (3.2)      |
| Global peak strain $E_{rr}$ (%)                           | 47.5 (7.8)         | 42.2 (7.8)       |
| Global peak strain $E_{ll}$ (%)                           | -19.1 (2.7)        | -17.8 (2.6)      |
| <b>Right ventricle</b>                                    |                    |                  |
| RV end-diastolic volume (mL)                              | 134.2 (24.3)       | 181.3 (33.3)     |
| RV end-systolic volume (mL)                               | 54.9 (13.4)        | 81.4 (19.4)      |
| RV stroke volume (mL)                                     | 79.3 (15.1)        | 99.9 (20.0)      |
| RV ejection fraction (%)                                  | 59.3 (5.7)         | 55.2 (5.9)       |
| <b>Left atrium</b>                                        |                    |                  |
| LA maximal volume (mL)                                    | 67.6 (19.2)        | 78.7 (25.8)      |
| LA minimal volume (mL)                                    | 26.5 (12.0)        | 32.4 (17.9)      |
| LA stroke volume (mL)                                     | 41.1 (10.1)        | 46.3 (12.7)      |
| LA ejection fraction (%)                                  | 61.9 (8.6)         | 60.5 (9.7)       |
| <b>Right atrium</b>                                       |                    |                  |
| RA maximal volume (mL)                                    | 75.2 (19.5)        | 97.8 (29.8)      |
| RA minimal volume (mL)                                    | 38.1 (12.5)        | 54.7 (20.8)      |
| RA stroke volume (mL)                                     | 37.1 (11.1)        | 43.1 (14.4)      |
| RA ejection fraction (%)                                  | 49.5 (8.8)         | 44.6 (9.0)       |
| <b>Ascending aorta</b>                                    |                    |                  |
| AAo maximal area (mm <sup>2</sup> )                       | 775.9 (156.0)      | 925.3 (189.5)    |
| AAo minimal area (mm <sup>2</sup> )                       | 703.3 (155.1)      | 841.8 (185.9)    |
| AAo distensibility (10 <sup>-3</sup> mmHg <sup>-1</sup> ) | 1.9 (1.5)          | 1.9 (1.2)        |
| <b>Descending aorta</b>                                   |                    |                  |
| DAo maximal area (mm <sup>2</sup> )                       | 421.4 (71.0)       | 529.5 (91.6)     |
| DAo minimal area (mm <sup>2</sup> )                       | 368.3 (68.3)       | 468.2 (87.3)     |
| DAo distensibility (10 <sup>-3</sup> mmHg <sup>-1</sup> ) | 2.5 (1.7)          | 2.5 (1.4)        |

**Supplementary Table 3. Statistics of global imaging phenotypes for the heart and aorta.** n = 26,893 subjects were analysed. The values are depicted as mean (standard deviation).

| Segment       | Women (n = 13,969)  |           | Men (n = 12,924)    |  |
|---------------|---------------------|-----------|---------------------|--|
|               | Wall thickness (mm) |           | Wall thickness (mm) |  |
| Basal         | 1                   | 6.1 (0.9) | 7.2 (1.1)           |  |
|               | 2                   | 4.6 (1.0) | 5.3 (1.2)           |  |
|               | 3                   | 4.9 (1.0) | 5.7 (1.1)           |  |
|               | 4                   | 5.6 (0.8) | 6.8 (1.0)           |  |
|               | 5                   | 5.8 (0.7) | 6.8 (0.8)           |  |
|               | 6                   | 5.8 (0.7) | 6.8 (0.9)           |  |
| Mid           | 7                   | 5.1 (0.6) | 6.2 (0.8)           |  |
|               | 8                   | 5.7 (0.7) | 6.9 (0.9)           |  |
|               | 9                   | 5.9 (0.8) | 7.2 (1.0)           |  |
|               | 10                  | 5.4 (0.7) | 6.6 (0.8)           |  |
|               | 11                  | 5.2 (0.6) | 6.2 (0.8)           |  |
|               | 12                  | 5.1 (0.6) | 6.1 (0.8)           |  |
| Apical        | 13                  | 4.2 (0.6) | 5.1 (0.7)           |  |
|               | 14                  | 4.4 (0.6) | 5.3 (0.7)           |  |
|               | 15                  | 4.1 (0.6) | 5.0 (0.7)           |  |
|               | 16                  | 4.3 (0.6) | 5.2 (0.7)           |  |
| <b>Global</b> | 5.2 (0.5)           | 6.2 (0.7) |                     |  |

**Supplementary Table 4. Statistics of regional and global myocardial wall thickness.** n = 26,893 subjects were analysed. The values are depicted as mean (standard deviation).

| Segment       | Women (n = 13,969) |              | Men (n = 12,924) |              |             |
|---------------|--------------------|--------------|------------------|--------------|-------------|
|               | $E_{cc}$ (%)       | $E_{rr}$ (%) | $E_{cc}$ (%)     | $E_{rr}$ (%) |             |
| Basal         | 1                  | -23.9 (5.2)  | 39.3 (12.9)      | -22.3 (5.3)  | 35.5 (12.8) |
|               | 2                  | -23.9 (6.6)  | 30.6 (11.6)      | -18.2 (6.9)  | 24.6 (11.2) |
|               | 3                  | -20.3 (6.1)  | 35.6 (13.2)      | -19.0 (5.2)  | 27.4 (13.0) |
|               | 4                  | -19.0 (5.9)  | 62.7 (17.8)      | -19.1 (5.4)  | 51.4 (16.0) |
|               | 5                  | -27.6 (5.2)  | 67.6 (16.2)      | -25.0 (5.3)  | 60.1 (14.3) |
|               | 6                  | -27.1 (5.5)  | 56.3 (18.7)      | -26.0 (5.1)  | 53.9 (16.7) |
| Mid           | 7                  | -27.9 (5.3)  | 52.8 (13.2)      | -24.7 (5.2)  | 47.2 (12.6) |
|               | 8                  | -27.3 (5.5)  | 43.7 (10.6)      | -24.8 (5.4)  | 40.5 (10.3) |
|               | 9                  | -23.5 (7.2)  | 49.3 (12.1)      | -21.8 (5.8)  | 44.3 (11.1) |
|               | 10                 | -15.6 (5.0)  | 51.0 (14.0)      | -15.5 (4.6)  | 45.4 (12.4) |
|               | 11                 | -22.9 (5.4)  | 57.1 (12.7)      | -20.7 (5.3)  | 50.5 (11.4) |
|               | 12                 | -20.3 (5.2)  | 53.6 (12.9)      | -18.0 (4.8)  | 46.7 (12.1) |
| Apical        | 13                 | -30.1 (5.7)  | 49.9 (13.5)      | -27.0 (5.9)  | 47.2 (13.6) |
|               | 14                 | -30.9 (5.8)  | 44.3 (12.6)      | -28.5 (5.8)  | 41.8 (13.0) |
|               | 15                 | -23.4 (6.5)  | 58.0 (14.5)      | -23.8 (6.5)  | 53.5 (14.0) |
|               | 16                 | -26.1 (5.7)  | 58.0 (13.5)      | -24.9 (6.0)  | 54.7 (13.4) |
| <b>Global</b> | -23.4 (3.0)        | 47.5 (7.8)   | -21.1 (3.2)      | 42.2 (7.8)   |             |

**Supplementary Table 5. Statistics of regional and global peak circumferential strain  $E_{cc}$  and peak radial strain  $E_{rr}$ .** n = 26,893 subjects were analysed. The values are depicted as mean (standard deviation).

| Segment |   | Women (n = 13,969)  | Men (n = 12,924)    |
|---------|---|---------------------|---------------------|
|         |   | E <sub>11</sub> (%) | E <sub>11</sub> (%) |
| Basal   | 1 | -27.3 (7.2)         | -27.1 (6.7)         |
|         | 2 | -32.6 (7.8)         | -32.2 (7.0)         |
| Mid     | 3 | -14.3 (5.0)         | -12.5 (4.9)         |
|         | 4 | -18.4 (5.6)         | -15.1 (5.2)         |
| Apical  | 5 | -11.1 (4.6)         | -10.6 (4.5)         |
|         | 6 | -17.2 (4.7)         | -15.5 (4.9)         |
| Global  |   | -19.1 (2.7)         | -17.8 (2.6)         |

**Supplementary Table 6. Statistics of regional and global peak longitudinal strain E<sub>11</sub>.** n = 26,893 subjects were analysed. The values are depicted as mean (standard deviation).

|                       | LVM (g)                                                 | LVEDV (mL)                                              | LVEF (%)                                               | RVEDV (mL)                                              | RVEF (%)                                            |
|-----------------------|---------------------------------------------------------|---------------------------------------------------------|--------------------------------------------------------|---------------------------------------------------------|-----------------------------------------------------|
| Sex                   | 53.0 <sub>[49.8,56.3]</sub> (p=3×10 <sup>-218</sup> )   | 53.1 <sub>[47.4,58.8]</sub> (p=2.9×10 <sup>-74</sup> )  | -3.2 <sub>[-3.4,-3.1]</sub> (p=10 <sup>-324</sup> )    | 71.1 <sub>[65.0,77.2]</sub> (p=7.7×10 <sup>-116</sup> ) | -4.1 <sub>[-4.2,-3.9]</sub> (p=10 <sup>-324</sup> ) |
| Age, per 7.5 yr       | -1.0 <sub>[-1.2,-0.7]</sub> (p=2.2×10 <sup>-12</sup> )  | -5.9 <sub>[-6.4,-5.5]</sub> (p=2.5×10 <sup>-136</sup> ) | 0.3 <sub>[0.3,0.4]</sub> (p=1.1×10 <sup>-19</sup> )    | -6.1 <sub>[-6.6,-5.7]</sub> (p=4.7×10 <sup>-130</sup> ) | 0.5 <sub>[0.4,0.6]</sub> (p=1.6×10 <sup>-37</sup> ) |
| Sex * Age, per 7.5 yr | -2.4 <sub>[-2.8,-2.1]</sub> (p=5.6×10 <sup>-36</sup> )  | -1.5 <sub>[-2.2,-0.8]</sub> (p=8.6×10 <sup>-6</sup> )   |                                                        | -2.6 <sub>[-3.3,-1.9]</sub> (p=4.6×10 <sup>-13</sup> )  |                                                     |
|                       | LAV max (mL)                                            | LAEF (%)                                                | RAV max (mL)                                           | RAEF (%)                                                |                                                     |
| Sex                   | 10.6 <sub>[10.1,11.2]</sub> (p=2.6×10 <sup>-297</sup> ) | -0.9 <sub>[-1.1,-0.7]</sub> (p=1.7×10 <sup>-15</sup> )  | 22.7 <sub>[22.1,23.3]</sub> (p=10 <sup>-324</sup> )    | -8.9 <sub>[-10.8,-7.0]</sub> (p=1.4×10 <sup>-19</sup> ) |                                                     |
| Age, per 7.5 yr       | -2.0 <sub>[-2.3,-1.7]</sub> (p=9.1×10 <sup>-44</sup> )  | -0.8 <sub>[-0.9,-0.7]</sub> (p=2.3×10 <sup>-43</sup> )  | -1.0 <sub>[-1.3,-0.7]</sub> (p=1.7×10 <sup>-9</sup> )  | -0.2 <sub>[-0.4,-0.1]</sub> (p=0.003)                   |                                                     |
| Sex * Age, per 7.5 yr |                                                         |                                                         |                                                        | 0.5 <sub>[0.3,0.7]</sub> (p=2.3×10 <sup>-5</sup> )      |                                                     |
|                       | AAo max area (mm <sup>2</sup> )                         | AAo distensibility                                      | DAo max area (mm <sup>2</sup> )                        | DAo distensibility                                      |                                                     |
| Sex                   | 143.9 <sub>[139.5,148.3]</sub> (p=10 <sup>-324</sup> )  | -0.9 <sub>[-1.2,-0.6]</sub> (p=2.1×10 <sup>-10</sup> )  | 104.9 <sub>[102.8,106.9]</sub> (p=10 <sup>-324</sup> ) | -1.1 <sub>[-1.5,-0.8]</sub> (p=1.7×10 <sup>-10</sup> )  |                                                     |
| Age, per 7.5 yr       | 29.3 <sub>[27.1,31.5]</sub> (p=6.1×10 <sup>-146</sup> ) | -0.7 <sub>[-0.7,-0.7]</sub> (p=10 <sup>-324</sup> )     | 20.8 <sub>[19.8,21.9]</sub> (p=10 <sup>-324</sup> )    | -0.8 <sub>[-0.8,-0.7]</sub> (p=10 <sup>-324</sup> )     |                                                     |
| Sex * Age, per 7.5 yr |                                                         | 0.1 <sub>[0.1,0.2]</sub> (p=8.4×10 <sup>-14</sup> )     |                                                        | 0.1 <sub>[0.1,0.2]</sub> (p=10 <sup>-11</sup> )         |                                                     |

**Supplementary Table 7. Associations of selected imaging phenotypes with sex and age.** After excluding non-Caucasian subjects and subjects with CVDs, n = 23,415 subjects were included in the analysis. The values are depicted as regression coefficient  $\beta$  [95% confidence interval] (two-sided t-test p-value). For continuous variables, the coefficient describes the effect per standard deviation of the variable. For binary variables, the coefficient describes the effect with a change in the variable from 0 to 1. Female is coded as 0.

|                       | LVM (g)                                                            | LVEDV (mL)                                                       | LVEF (%)                                                           | RVEDV (mL)                                                        | RVEF (%)                                                         |
|-----------------------|--------------------------------------------------------------------|------------------------------------------------------------------|--------------------------------------------------------------------|-------------------------------------------------------------------|------------------------------------------------------------------|
| Sex                   | 30.2 <sub>[27.4,33.0]</sub> ( <i>p</i> =10 <sup>-96</sup> )        | 22.5 <sub>[17.0,28.0]</sub> ( <i>p</i> =10 <sup>-15</sup> )      | -2.5 <sub>[-2.8,-2.3]</sub> ( <i>p</i> =3.6×10 <sup>-89</sup> )    | 41.5 <sub>[35.6,47.4]</sub> ( <i>p</i> =3.2×10 <sup>-43</sup> )   | -3.7 <sub>[-3.9,-3.5]</sub> ( <i>p</i> =3.7×10 <sup>-193</sup> ) |
| Age, per 7.5 yr       | -1.2 <sub>[-1.4,-0.9]</sub> ( <i>p</i> =8×10 <sup>-20</sup> )      | -5.2 <sub>[-5.6,-4.7]</sub> ( <i>p</i> =2.3×10 <sup>-94</sup> )  | -0.0 <sub>[-0.1,0.1]</sub> ( <i>p</i> =0.903)                      | -4.2 <sub>[-4.7,-3.7]</sub> ( <i>p</i> =3.6×10 <sup>-56</sup> )   | -0.1 <sub>[-0.1,0.0]</sub> ( <i>p</i> =0.250)                    |
| Sex * Age, per 7.5 yr | -1.6 <sub>[-1.9,-1.3]</sub> ( <i>p</i> =4×10 <sup>-22</sup> )      | -0.9 <sub>[-1.5,-0.3]</sub> ( <i>p</i> =0.006)                   |                                                                    | -2.2 <sub>[-2.9,-1.5]</sub> ( <i>p</i> =2.7×10 <sup>-10</sup> )   |                                                                  |
| Weight, per 15.1 kg   | 8.2 <sub>[8.0,8.4]</sub> ( <i>p</i> =10 <sup>-324</sup> )          | 8.4 <sub>[8.0,8.8]</sub> ( <i>p</i> =10 <sup>-324</sup> )        | 0.1 <sub>[0.0,0.2]</sub> ( <i>p</i> =0.035)                        | 9.2 <sub>[8.8,9.7]</sub> ( <i>p</i> =10 <sup>-324</sup> )         | -0.4 <sub>[-0.5,-0.3]</sub> ( <i>p</i> =1.6×10 <sup>-12</sup> )  |
| Height, per 9.2 cm    | 3.8 <sub>[3.5,4.0]</sub> ( <i>p</i> =3.5×10 <sup>-172</sup> )      | 10.7 <sub>[10.2,11.2]</sub> ( <i>p</i> =10 <sup>-324</sup> )     | -0.5 <sub>[-0.7,-0.4]</sub> ( <i>p</i> =2×10 <sup>-16</sup> )      | 11.2 <sub>[10.6,11.7]</sub> ( <i>p</i> =10 <sup>-324</sup> )      | -0.1 <sub>[-0.3,-0.0]</sub> ( <i>p</i> =0.029)                   |
| SBP, per 18.0 mmHg    | 4.8 <sub>[4.6,5.1]</sub> ( <i>p</i> =10 <sup>-324</sup> )          | 5.8 <sub>[5.3,6.3]</sub> ( <i>p</i> =2.4×10 <sup>-130</sup> )    | 0.9 <sub>[0.8,1.0]</sub> ( <i>p</i> =4.9×10 <sup>-49</sup> )       | 3.0 <sub>[2.5,3.5]</sub> ( <i>p</i> =4.8×10 <sup>-32</sup> )      | 1.6 <sub>[1.5,1.7]</sub> ( <i>p</i> =1.4×10 <sup>-161</sup> )    |
| DBP, per 10.0 mmHg    | -1.4 <sub>[-1.7,-1.2]</sub> ( <i>p</i> =5.5×10 <sup>-35</sup> )    | -5.4 <sub>[-5.8,-4.9]</sub> ( <i>p</i> =1.1×10 <sup>-120</sup> ) | -0.7 <sub>[-0.8,-0.6]</sub> ( <i>p</i> =5.8×10 <sup>-38</sup> )    | -4.3 <sub>[-4.8,-3.8]</sub> ( <i>p</i> =4.3×10 <sup>-68</sup> )   | -0.8 <sub>[-0.9,-0.7]</sub> ( <i>p</i> =1.3×10 <sup>-45</sup> )  |
| Smoking status        | 2.4 <sub>[1.5,3.2]</sub> ( <i>p</i> =6.7×10 <sup>-8</sup> )        | -1.3 <sub>[-3.0,0.3]</sub> ( <i>p</i> =0.118)                    | -0.4 <sub>[-0.9,-0.0]</sub> ( <i>p</i> =0.037)                     | -4.4 <sub>[-6.2,-2.6]</sub> ( <i>p</i> =1.2×10 <sup>-6</sup> )    | -0.4 <sub>[-0.8,0.1]</sub> ( <i>p</i> =0.086)                    |
| Alcohol, per 18.7 g/d | 1.0 <sub>[0.8,1.1]</sub> ( <i>p</i> =3.4×10 <sup>-27</sup> )       | 1.4 <sub>[1.1,1.8]</sub> ( <i>p</i> =7.7×10 <sup>-17</sup> )     | -0.0 <sub>[-0.1,0.0]</sub> ( <i>p</i> =0.364)                      | 1.1 <sub>[0.7,1.5]</sub> ( <i>p</i> =3.9×10 <sup>-9</sup> )       | 0.0 <sub>[-0.1,0.1]</sub> ( <i>p</i> =0.472)                     |
| PA, per 1.9 d/w       | 2.1 <sub>[1.9,2.3]</sub> ( <i>p</i> =6.4×10 <sup>-132</sup> )      | 4.3 <sub>[3.9,4.6]</sub> ( <i>p</i> =7.1×10 <sup>-144</sup> )    | -0.2 <sub>[-0.2,-0.1]</sub> ( <i>p</i> =1.1×10 <sup>-4</sup> )     | 4.7 <sub>[4.3,5.0]</sub> ( <i>p</i> =2.1×10 <sup>-150</sup> )     | -0.2 <sub>[-0.3,-0.1]</sub> ( <i>p</i> =3.2×10 <sup>-8</sup> )   |
| High cholesterol      | -0.4 <sub>[-0.9,0.1]</sub> ( <i>p</i> =0.138)                      | -2.8 <sub>[-3.9,-1.8]</sub> ( <i>p</i> =7.4×10 <sup>-8</sup> )   | 0.2 <sub>[-0.1,0.4]</sub> ( <i>p</i> =0.230)                       | -2.9 <sub>[-4.0,-1.8]</sub> ( <i>p</i> =3.5×10 <sup>-7</sup> )    | 0.3 <sub>[0.0,0.5]</sub> ( <i>p</i> =0.046)                      |
| Diabetes              | -1.0 <sub>[-1.8,-0.1]</sub> ( <i>p</i> =0.025)                     | -8.7 <sub>[-10.3,-7.0]</sub> ( <i>p</i> =1.4×10 <sup>-24</sup> ) | -1.0 <sub>[-1.4,-0.5]</sub> ( <i>p</i> =5.1×10 <sup>-6</sup> )     | -11.1 <sub>[-12.9,-9.3]</sub> ( <i>p</i> =3.4×10 <sup>-34</sup> ) | -0.7 <sub>[-1.1,-0.3]</sub> ( <i>p</i> =5×10 <sup>-4</sup> )     |
|                       | LAV max (mL)                                                       | LAEF (%)                                                         | RAV max (mL)                                                       | RAEF (%)                                                          |                                                                  |
| Sex                   | -1.0 <sub>[-1.8,-0.1]</sub> ( <i>p</i> =0.033)                     | 0.7 <sub>[0.4,1.1]</sub> ( <i>p</i> =1.1×10 <sup>-4</sup> )      | 9.0 <sub>[8.0,10.0]</sub> ( <i>p</i> =8.2×10 <sup>-67</sup> )      | -8.7 <sub>[-10.7,-6.6]</sub> ( <i>p</i> =5.4×10 <sup>-16</sup> )  |                                                                  |
| Age, per 7.5 yr       | -2.3 <sub>[-2.6,-1.9]</sub> ( <i>p</i> =7.2×10 <sup>-43</sup> )    | -1.0 <sub>[-1.1,-0.8]</sub> ( <i>p</i> =1.4×10 <sup>-43</sup> )  | 0.8 <sub>[0.4,1.1]</sub> ( <i>p</i> =5.6×10 <sup>-5</sup> )        | -0.7 <sub>[-0.9,-0.5]</sub> ( <i>p</i> =2.1×10 <sup>-13</sup> )   |                                                                  |
| Sex * Age, per 7.5 yr |                                                                    |                                                                  |                                                                    | 0.6 <sub>[0.3,0.8]</sub> ( <i>p</i> =2×10 <sup>-6</sup> )         |                                                                  |
| Weight, per 15.1 kg   | 7.8 <sub>[7.4,8.2]</sub> ( <i>p</i> =10 <sup>-324</sup> )          | -0.9 <sub>[-1.1,-0.8]</sub> ( <i>p</i> =3.2×10 <sup>-31</sup> )  | -0.4 <sub>[-0.8,0.0]</sub> ( <i>p</i> =0.078)                      | 0.1 <sub>[-0.1,0.2]</sub> ( <i>p</i> =0.344)                      |                                                                  |
| Height, per 9.2 cm    | 1.8 <sub>[1.4,2.3]</sub> ( <i>p</i> =4.1×10 <sup>-15</sup> )       | -0.4 <sub>[-0.6,-0.2]</sub> ( <i>p</i> =1.8×10 <sup>-5</sup> )   | 9.7 <sub>[9.1,10.2]</sub> ( <i>p</i> =2.8×10 <sup>-280</sup> )     | -0.9 <sub>[-1.1,-0.7]</sub> ( <i>p</i> =1.5×10 <sup>-18</sup> )   |                                                                  |
| SBP, per 18.0 mmHg    | 4.8 <sub>[4.4,5.3]</sub> ( <i>p</i> =8.3×10 <sup>-115</sup> )      | -0.0 <sub>[-0.2,0.1]</sub> ( <i>p</i> =0.647)                    | -0.1 <sub>[-0.6,0.4]</sub> ( <i>p</i> =0.713)                      | 0.9 <sub>[0.7,1.0]</sub> ( <i>p</i> =3.9×10 <sup>-21</sup> )      |                                                                  |
| DBP, per 10.0 mmHg    | -4.1 <sub>[-4.5,-3.7]</sub> ( <i>p</i> =1.7×10 <sup>-88</sup> )    | 0.5 <sub>[0.3,0.6]</sub> ( <i>p</i> =8.9×10 <sup>-8</sup> )      | -1.5 <sub>[-2.0,-1.1]</sub> ( <i>p</i> =6.6×10 <sup>-11</sup> )    | 0.0 <sub>[-0.1,0.2]</sub> ( <i>p</i> =0.738)                      |                                                                  |
| Smoking status        | -3.5 <sub>[-5.0,-2.1]</sub> ( <i>p</i> =2.9×10 <sup>-6</sup> )     | -0.2 <sub>[-0.9,0.4]</sub> ( <i>p</i> =0.436)                    | -5.4 <sub>[-7.1,-3.7]</sub> ( <i>p</i> =5.3×10 <sup>-10</sup> )    | 0.1 <sub>[-0.6,0.7]</sub> ( <i>p</i> =0.835)                      |                                                                  |
| Alcohol, per 18.7 g/d | 1.1 <sub>[0.8,1.4]</sub> ( <i>p</i> =4.5×10 <sup>-13</sup> )       | -0.2 <sub>[-0.3,-0.1]</sub> ( <i>p</i> =0.003)                   | 0.6 <sub>[0.2,0.9]</sub> ( <i>p</i> =7.6×10 <sup>-4</sup> )        | -0.1 <sub>[-0.3,-0.0]</sub> ( <i>p</i> =0.035)                    |                                                                  |
| PA, per 1.9 d/w       | 2.6 <sub>[2.3,2.9]</sub> ( <i>p</i> =9.7×10 <sup>-69</sup> )       | -0.4 <sub>[-0.5,-0.2]</sub> ( <i>p</i> =3.4×10 <sup>-9</sup> )   | 3.1 <sub>[2.8,3.4]</sub> ( <i>p</i> =3.9×10 <sup>-74</sup> )       | -0.5 <sub>[-0.7,-0.4]</sub> ( <i>p</i> =1.8×10 <sup>-17</sup> )   |                                                                  |
| High cholesterol      | -1.7 <sub>[-2.6,-0.8]</sub> ( <i>p</i> =3.7×10 <sup>-4</sup> )     | 0.3 <sub>[-0.1,0.7]</sub> ( <i>p</i> =0.111)                     | -3.3 <sub>[-4.3,-2.2]</sub> ( <i>p</i> =1.6×10 <sup>-9</sup> )     | 0.3 <sub>[-0.1,0.7]</sub> ( <i>p</i> =0.196)                      |                                                                  |
| Diabetes              | -3.5 <sub>[-5.0,-2.1]</sub> ( <i>p</i> =2.6×10 <sup>-6</sup> )     | -1.1 <sub>[-1.7,-0.4]</sub> ( <i>p</i> =9.3×10 <sup>-4</sup> )   | -7.2 <sub>[-8.9,-5.5]</sub> ( <i>p</i> =1.1×10 <sup>-16</sup> )    | -0.0 <sub>[-0.6,0.6]</sub> ( <i>p</i> =0.960)                     |                                                                  |
|                       | AAo max area (mm <sup>2</sup> )                                    | AAo distensibility                                               | DAo max area (mm <sup>2</sup> )                                    | DAo distensibility                                                |                                                                  |
| Sex                   | 42.2 <sub>[35.2,49.2]</sub> ( <i>p</i> =8.7×10 <sup>-32</sup> )    | -0.6 <sub>[-0.9,-0.2]</sub> ( <i>p</i> =5.5×10 <sup>-4</sup> )   | 49.1 <sub>[45.9,52.2]</sub> ( <i>p</i> =2.5×10 <sup>-197</sup> )   | -0.7 <sub>[-1.0,-0.3]</sub> ( <i>p</i> =7×10 <sup>-4</sup> )      |                                                                  |
| Age, per 7.5 yr       | 44.0 <sub>[41.4,46.6]</sub> ( <i>p</i> =3.7×10 <sup>-241</sup> )   | -0.7 <sub>[-0.7,-0.6]</sub> ( <i>p</i> =10 <sup>-324</sup> )     | 27.2 <sub>[26.0,28.3]</sub> ( <i>p</i> =10 <sup>-324</sup> )       | -0.7 <sub>[-0.7,-0.6]</sub> ( <i>p</i> =10 <sup>-324</sup> )      |                                                                  |
| Sex * Age, per 7.5 yr |                                                                    | 0.1 <sub>[0.1,0.1]</sub> ( <i>p</i> =3.9×10 <sup>-8</sup> )      |                                                                    | 0.1 <sub>[0.1,0.1]</sub> ( <i>p</i> =6.7×10 <sup>-6</sup> )       |                                                                  |
| Weight, per 15.1 kg   | 36.6 <sub>[33.6,39.6]</sub> ( <i>p</i> =1.8×10 <sup>-122</sup> )   | 0.0 <sub>[0.0,0.1]</sub> ( <i>p</i> =2.4×10 <sup>-4</sup> )      | 26.2 <sub>[24.9,27.6]</sub> ( <i>p</i> =1.6×10 <sup>-300</sup> )   | -0.0 <sub>[-0.1,-0.0]</sub> ( <i>p</i> =0.023)                    |                                                                  |
| Height, per 9.2 cm    | 29.5 <sub>[25.9,33.1]</sub> ( <i>p</i> =2.2×10 <sup>-57</sup> )    | -0.1 <sub>[-0.1,-0.0]</sub> ( <i>p</i> =1.5×10 <sup>-5</sup> )   | 14.3 <sub>[12.7,16.0]</sub> ( <i>p</i> =3.2×10 <sup>-66</sup> )    | 0.0 <sub>[-0.0,0.1]</sub> ( <i>p</i> =0.335)                      |                                                                  |
| SBP, per 18.0 mmHg    | -13.5 <sub>[-16.8,-10.2]</sub> ( <i>p</i> =1.2×10 <sup>-15</sup> ) | -0.2 <sub>[-0.2,-0.2]</sub> ( <i>p</i> =1.1×10 <sup>-41</sup> )  | -0.2 <sub>[-1.7,1.3]</sub> ( <i>p</i> =0.783)                      | -0.3 <sub>[-0.3,-0.2]</sub> ( <i>p</i> =2.9×10 <sup>-53</sup> )   |                                                                  |
| DBP, per 10.0 mmHg    | 40.5 <sub>[37.3,43.6]</sub> ( <i>p</i> =2.4×10 <sup>-135</sup> )   | -0.1 <sub>[-0.1,-0.1]</sub> ( <i>p</i> =2.2×10 <sup>-15</sup> )  | 10.8 <sub>[9.4,12.3]</sub> ( <i>p</i> =2.5×10 <sup>-49</sup> )     | -0.1 <sub>[-0.1,-0.0]</sub> ( <i>p</i> =1.9×10 <sup>-6</sup> )    |                                                                  |
| Smoking status        | 10.3 <sub>[-1.6,22.2]</sub> ( <i>p</i> =0.090)                     | 0.0 <sub>[-0.1,0.1]</sub> ( <i>p</i> =0.636)                     | 14.5 <sub>[9.1,19.9]</sub> ( <i>p</i> =1.3×10 <sup>-7</sup> )      | 0.1 <sub>[-0.0,0.2]</sub> ( <i>p</i> =0.054)                      |                                                                  |
| Alcohol, per 18.7 g/d | 11.7 <sub>[9.3,14.1]</sub> ( <i>p</i> =1.6×10 <sup>-21</sup> )     | -0.0 <sub>[-0.0,0.0]</sub> ( <i>p</i> =0.076)                    | 4.4 <sub>[3.3,5.4]</sub> ( <i>p</i> =3.3×10 <sup>-15</sup> )       | -0.0 <sub>[-0.1,-0.0]</sub> ( <i>p</i> =0.010)                    |                                                                  |
| PA, per 1.9 d/w       | 10.5 <sub>[8.2,12.8]</sub> ( <i>p</i> =5.2×10 <sup>-19</sup> )     | 0.0 <sub>[0.0,0.1]</sub> ( <i>p</i> =1.5×10 <sup>-5</sup> )      | 6.3 <sub>[5.3,7.4]</sub> ( <i>p</i> =4.9×10 <sup>-33</sup> )       | 0.0 <sub>[0.0,0.1]</sub> ( <i>p</i> =5.9×10 <sup>-5</sup> )       |                                                                  |
| High cholesterol      | -0.0 <sub>[-7.3,7.3]</sub> ( <i>p</i> =0.998)                      | -0.0 <sub>[-0.1,0.1]</sub> ( <i>p</i> =0.955)                    | -5.1 <sub>[-8.3,-1.8]</sub> ( <i>p</i> =0.003)                     | -0.0 <sub>[-0.1,0.1]</sub> ( <i>p</i> =0.799)                     |                                                                  |
| Diabetes              | -19.7 <sub>[-31.5,-7.9]</sub> ( <i>p</i> =0.001)                   | 0.0 <sub>[-0.1,0.1]</sub> ( <i>p</i> =0.991)                     | -17.6 <sub>[-22.9,-12.3]</sub> ( <i>p</i> =8.9×10 <sup>-11</sup> ) | -0.1 <sub>[-0.2,0.1]</sub> ( <i>p</i> =0.317)                     |                                                                  |

**Supplementary Table 8. Associations of imaging phenotypes with cardiovascular risk factors.** n = 19,988 subjects were analysed with available information for all independent variables. The values are depicted as regression coefficient  $\beta$  [95% confidence interval] (two-sided t-test p-value). Independent variables include sex, age, weight, height, systolic blood pressure (SBP), diastolic blood pressure (DBP), current smoking status, alcohol intake, vigorous physical activity (PA) frequency, high cholesterol, diabetes. For continuous variables, the coefficient describes the effect per standard deviation of the variable. For binary variables, the coefficient describes the effect with a change in the variable from 0 to 1. Female is coded as 0.

| Category         | Code                                   | Meaning                                    |
|------------------|----------------------------------------|--------------------------------------------|
| Hypertension     | 1065                                   | Hypertension                               |
|                  | 1072                                   | Essential hypertension                     |
|                  | 1073                                   | Gestational hypertension/pre-eclampsia     |
| High cholesterol | 1473                                   | High cholesterol                           |
| Cardiac disease  | 1066                                   | Heart/cardiac problem                      |
|                  | 1074                                   | Angina                                     |
|                  | 1075                                   | Heart attack/myocardial infarction         |
|                  | 1076                                   | Heart failure/pulmonary odema              |
|                  | 1077                                   | Heart arrhythmia                           |
|                  | 1471                                   | Atrial fibrillation                        |
|                  | 1483                                   | Atrial flutter                             |
|                  | 1484                                   | Wolff Parkinson white/WPW syndrome         |
|                  | 1485                                   | Irregular heart beat                       |
|                  | 1486                                   | Sick sinus syndrome                        |
|                  | 1487                                   | SVT/supraventricular tachycardia           |
|                  | 1078                                   | Heart valve problem/heart murmur           |
|                  | 1584                                   | Mitral valve disease                       |
|                  | 1585                                   | Mitral regurgitation/incompetence          |
|                  | 1586                                   | Aortic valve disease                       |
|                  | 1587                                   | Aortic regurgitation/incompetence          |
|                  | 1079                                   | Cardiomyopathy                             |
| 1588             | Hypertrophic cardiomyopathy (HCM/HOCM) |                                            |
| 1080             | Pericardial problem                    |                                            |
| 1589             | Pericarditis                           |                                            |
| 1590             | Pericardial effusion                   |                                            |
| PVD              | 1067                                   | Peripheral vascular disease                |
|                  | 1087                                   | Leg claudication/intermittent claudication |
|                  | 1088                                   | Arterial embolism                          |
|                  | 1492                                   | Aortic aneurysm                            |
|                  | 1591                                   | Aortic aneurysm rupture                    |
|                  | 1592                                   | Aortic dissection                          |
| Diabetes         | 1220                                   | Diabetes                                   |
|                  | 1221                                   | Gestational diabetes                       |
|                  | 1222                                   | Type 1 diabetes                            |
|                  | 1223                                   | Type 2 diabetes                            |
| Stroke           | 1081                                   | Stroke                                     |
|                  | 1086                                   | Subarachnoid haemorrhage                   |
|                  | 1491                                   | Brain haemorrhage                          |
|                  | 1583                                   | Ischaemic stroke                           |
| Asthma           | 1111                                   | Asthma                                     |
| COPD             | 1112                                   | Chronic obstructive airways disease/COPD   |
| Bronchitis       | 1113                                   | Emphysema/chronic bronchitis               |
|                  | 1412                                   | Bronchitis                                 |
|                  | 1472                                   | Emphysema                                  |
|                  | 1496                                   | Alpha-1 antitrypsin deficiency             |
| Parkinson's      | 1262                                   | Parkinson's disease                        |
| Dementia         | 1263                                   | Dementia/Alzheimer's/cognitive impairment  |
| Depression       | 1286                                   | Depression                                 |
|                  | 1531                                   | Post-natal depression                      |

**Supplementary Table 9. Categories of common diseases in participants. Defined by self-reported disease code (UK Biobank field ID 20002).**

|                  | <b>LVM</b><br>per 22.2 g                                        | <b>LVEDV</b><br>per 33.8 mL                                                | <b>LVEF</b><br>per 6.1 %                                        | <b>RVEDV</b><br>per 37.3 mL                                                | <b>RVEF</b><br>per 6.1 %                                        |
|------------------|-----------------------------------------------------------------|----------------------------------------------------------------------------|-----------------------------------------------------------------|----------------------------------------------------------------------------|-----------------------------------------------------------------|
| Hypertension     | 1.66 <sub>[1.58,1.75]</sub> ( <i>p</i> =3×10 <sup>-84</sup> )   | 1.05 <sub>[1.01,1.09]</sub> ( <i>p</i> =0.024)                             | 1.10 <sub>[1.07,1.13]</sub> ( <i>p</i> =2×10 <sup>-10</sup> )   | 0.96 <sub>[0.92,1.00]</sub> ( <i>p</i> =0.072)                             | 1.14 <sub>[1.11,1.18]</sub> ( <i>p</i> =6.2×10 <sup>-17</sup> ) |
| High cholesterol | 0.97 <sub>[0.91,1.03]</sub> ( <i>p</i> =0.361)                  | 0.87 <sub>[0.82,0.92]</sub> ( <i>p</i> =2.1×10 <sup>-7</sup> )             | 1.00 <sub>[0.96,1.03]</sub> ( <i>p</i> =0.869)                  | 0.86 <sub>[0.82,0.91]</sub> ( <i>p</i> =4×10 <sup>-7</sup> )               | 1.01 <sub>[0.97,1.05]</sub> ( <i>p</i> =0.534)                  |
| Cardiac disease  | 1.41 <sub>[1.31,1.53]</sub> ( <i>p</i> =1.8×10 <sup>-19</sup> ) | 1.44 <sub>[1.36,1.53]</sub> ( <i>p</i> =8.3×10 <sup>-33</sup> )            | 0.76 <sub>[0.72,0.79]</sub> ( <i>p</i> =4.2×10 <sup>-35</sup> ) | 1.10 <sub>[1.03,1.18]</sub> ( <i>p</i> =0.008)                             | 0.84 <sub>[0.80,0.88]</sub> ( <i>p</i> =8.1×10 <sup>-14</sup> ) |
| PVD              | 1.34 <sub>[0.81,2.21]</sub> ( <i>p</i> =0.253)                  | 1.44 <sub>[1.01,2.04]</sub> ( <i>p</i> =0.044)                             | 0.80 <sub>[0.59,1.09]</sub> ( <i>p</i> =0.152)                  | 1.07 <sub>[0.65,1.76]</sub> ( <i>p</i> =0.782)                             | 0.81 <sub>[0.58,1.11]</sub> ( <i>p</i> =0.186)                  |
| Diabetes         | 0.94 <sub>[0.86,1.03]</sub> ( <i>p</i> =0.210)                  | 0.66 <sub>[0.61,0.72]</sub> ( <i>p</i> =1.8×10 <sup>-22</sup> )            | 0.90 <sub>[0.86,0.95]</sub> ( <i>p</i> =1.8×10 <sup>-4</sup> )  | 0.56 <sub>[0.52,0.62]</sub> ( <i>p</i> =1.3×10 <sup>-37</sup> )            | 0.94 <sub>[0.89,0.99]</sub> ( <i>p</i> =0.028)                  |
| Stroke           | 0.97 <sub>[0.79,1.17]</sub> ( <i>p</i> =0.724)                  | 0.91 <sub>[0.78,1.07]</sub> ( <i>p</i> =0.259)                             | 0.94 <sub>[0.84,1.04]</sub> ( <i>p</i> =0.228)                  | 0.82 <sub>[0.69,0.97]</sub> ( <i>p</i> =0.024)                             | 0.90 <sub>[0.80,1.00]</sub> ( <i>p</i> =0.056)                  |
| Asthma           | 1.03 <sub>[0.96,1.10]</sub> ( <i>p</i> =0.482)                  | 0.95 <sub>[0.90,1.01]</sub> ( <i>p</i> =0.074)                             | 0.99 <sub>[0.95,1.03]</sub> ( <i>p</i> =0.527)                  | 0.90 <sub>[0.85,0.96]</sub> ( <i>p</i> =8.7×10 <sup>-4</sup> )             | 1.04 <sub>[1.00,1.09]</sub> ( <i>p</i> =0.044)                  |
| COPD             | 0.99 <sub>[0.78,1.27]</sub> ( <i>p</i> =0.963)                  | 0.69 <sub>[0.55,0.86]</sub> ( <i>p</i> =8.8×10 <sup>-4</sup> )             | 0.88 <sub>[0.77,1.01]</sub> ( <i>p</i> =0.069)                  | 0.54 <sub>[0.42,0.68]</sub> ( <i>p</i> =2.2×10 <sup>-7</sup> )             | 0.85 <sub>[0.74,0.98]</sub> ( <i>p</i> =0.021)                  |
| Bronchitis       | 0.95 <sub>[0.81,1.12]</sub> ( <i>p</i> =0.565)                  | 0.83 <sub>[0.72,0.94]</sub> ( <i>p</i> =0.005)                             | 0.90 <sub>[0.83,0.98]</sub> ( <i>p</i> =0.019)                  | 0.78 <sub>[0.68,0.89]</sub> ( <i>p</i> =3.9×10 <sup>-4</sup> )             | 0.92 <sub>[0.85,1.01]</sub> ( <i>p</i> =0.075)                  |
| Parkinson's      | 0.64 <sub>[0.37,1.12]</sub> ( <i>p</i> =0.117)                  | 1.02 <sub>[0.69,1.51]</sub> ( <i>p</i> =0.916)                             | 1.20 <sub>[0.89,1.62]</sub> ( <i>p</i> =0.235)                  | 1.13 <sub>[0.73,1.73]</sub> ( <i>p</i> =0.583)                             | 1.14 <sub>[0.83,1.55]</sub> ( <i>p</i> =0.413)                  |
| Dementia         | 0.25 <sub>[0.08,0.82]</sub> ( <i>p</i> =0.023)                  | 0.41 <sub>[0.17,0.99]</sub> ( <i>p</i> =0.048)                             | 0.97 <sub>[0.58,1.62]</sub> ( <i>p</i> =0.899)                  | 0.47 <sub>[0.19,1.13]</sub> ( <i>p</i> =0.090)                             | 1.09 <sub>[0.63,1.91]</sub> ( <i>p</i> =0.751)                  |
| Depression       | 0.97 <sub>[0.90,1.06]</sub> ( <i>p</i> =0.517)                  | 0.93 <sub>[0.87,1.00]</sub> ( <i>p</i> =0.046)                             | 0.98 <sub>[0.93,1.02]</sub> ( <i>p</i> =0.279)                  | 0.89 <sub>[0.83,0.96]</sub> ( <i>p</i> =0.001)                             | 1.01 <sub>[0.96,1.06]</sub> ( <i>p</i> =0.693)                  |
|                  | <b>LAV max</b><br>per 23.2 mL                                   | <b>LAEF</b><br>per 9.1 %                                                   | <b>RAV max</b><br>per 27.4 mL                                   | <b>RAEF</b><br>per 9.2 %                                                   |                                                                 |
| Hypertension     | 1.10 <sub>[1.07,1.14]</sub> ( <i>p</i> =6.5×10 <sup>-10</sup> ) | 0.99 <sub>[0.96,1.02]</sub> ( <i>p</i> =0.362)                             | 0.92 <sub>[0.89,0.95]</sub> ( <i>p</i> =9.3×10 <sup>-7</sup> )  | 1.12 <sub>[1.08,1.15]</sub> ( <i>p</i> =8.8×10 <sup>-13</sup> )            |                                                                 |
| High cholesterol | 0.92 <sub>[0.88,0.96]</sub> ( <i>p</i> =3.8×10 <sup>-5</sup> )  | 1.01 <sub>[0.97,1.04]</sub> ( <i>p</i> =0.758)                             | 0.88 <sub>[0.84,0.92]</sub> ( <i>p</i> =2.1×10 <sup>-8</sup> )  | 1.00 <sub>[0.96,1.04]</sub> ( <i>p</i> =0.914)                             |                                                                 |
| Cardiac disease  | 1.49 <sub>[1.42,1.56]</sub> ( <i>p</i> =1.5×10 <sup>-63</sup> ) | 0.61 <sub>[0.58,0.63]</sub> ( <i>p</i> =2.3×10 <sup>-107</sup> )           | 1.28 <sub>[1.22,1.34]</sub> ( <i>p</i> =2.2×10 <sup>-22</sup> ) | 0.71 <sub>[0.67,0.74]</sub> ( <i>p</i> =1.8×10 <sup>-38</sup> )            |                                                                 |
| PVD              | 1.20 <sub>[0.89,1.61]</sub> ( <i>p</i> =0.230)                  | 0.70 <sub>[0.52,0.94]</sub> ( <i>p</i> =0.017)                             | 1.32 <sub>[1.01,1.72]</sub> ( <i>p</i> =0.041)                  | 0.82 <sub>[0.56,1.19]</sub> ( <i>p</i> =0.300)                             |                                                                 |
| Diabetes         | 0.87 <sub>[0.82,0.92]</sub> ( <i>p</i> =6.3×10 <sup>-6</sup> )  | 0.92 <sub>[0.87,0.97]</sub> ( <i>p</i> =0.002)                             | 0.68 <sub>[0.64,0.73]</sub> ( <i>p</i> =1.8×10 <sup>-25</sup> ) | 1.01 <sub>[0.95,1.07]</sub> ( <i>p</i> =0.808)                             |                                                                 |
| Stroke           | 1.01 <sub>[0.90,1.14]</sub> ( <i>p</i> =0.873)                  | 0.86 <sub>[0.78,0.96]</sub> ( <i>p</i> =0.005)                             | 0.93 <sub>[0.82,1.07]</sub> ( <i>p</i> =0.313)                  | 0.84 <sub>[0.75,0.95]</sub> ( <i>p</i> =0.005)                             |                                                                 |
| Asthma           | 0.92 <sub>[0.88,0.96]</sub> ( <i>p</i> =3.7×10 <sup>-4</sup> )  | 1.06 <sub>[1.02,1.11]</sub> ( <i>p</i> =0.003)                             | 0.93 <sub>[0.89,0.98]</sub> ( <i>p</i> =0.004)                  | 1.07 <sub>[1.02,1.11]</sub> ( <i>p</i> =0.003)                             |                                                                 |
| COPD             | 0.77 <sub>[0.64,0.92]</sub> ( <i>p</i> =0.004)                  | 0.87 <sub>[0.76,1.00]</sub> ( <i>p</i> =0.056)                             | 0.73 <sub>[0.60,0.89]</sub> ( <i>p</i> =0.001)                  | 1.07 <sub>[0.92,1.25]</sub> ( <i>p</i> =0.382)                             |                                                                 |
| Bronchitis       | 0.90 <sub>[0.81,1.00]</sub> ( <i>p</i> =0.050)                  | 0.87 <sub>[0.80,0.94]</sub> ( <i>p</i> =7.9×10 <sup>-4</sup> )             | 0.77 <sub>[0.69,0.86]</sub> ( <i>p</i> =7.6×10 <sup>-6</sup> )  | 1.00 <sub>[0.91,1.10]</sub> ( <i>p</i> =0.969)                             |                                                                 |
| Parkinson's      | 1.17 <sub>[0.90,1.50]</sub> ( <i>p</i> =0.234)                  | 1.10 <sub>[0.83,1.45]</sub> ( <i>p</i> =0.507)                             | 1.16 <sub>[0.88,1.54]</sub> ( <i>p</i> =0.284)                  | 1.51 <sub>[1.16,1.95]</sub> ( <i>p</i> =0.002)                             |                                                                 |
| Dementia         | 0.77 <sub>[0.40,1.47]</sub> ( <i>p</i> =0.422)                  | 0.80 <sub>[0.50,1.27]</sub> ( <i>p</i> =0.341)                             | 0.65 <sub>[0.32,1.32]</sub> ( <i>p</i> =0.231)                  | 1.03 <sub>[0.59,1.78]</sub> ( <i>p</i> =0.920)                             |                                                                 |
| Depression       | 0.94 <sub>[0.89,0.99]</sub> ( <i>p</i> =0.019)                  | 0.99 <sub>[0.95,1.04]</sub> ( <i>p</i> =0.795)                             | 0.92 <sub>[0.87,0.97]</sub> ( <i>p</i> =0.002)                  | 0.99 <sub>[0.95,1.04]</sub> ( <i>p</i> =0.801)                             |                                                                 |
|                  | <b>AAo max area</b><br>per 188.4 mm <sup>2</sup>                | <b>AAo distensibility</b><br>per 1.4 × 10 <sup>-3</sup> mmHg <sup>-1</sup> | <b>DAo max area</b><br>per 97.8 mm <sup>2</sup>                 | <b>DAo distensibility</b><br>per 1.6 × 10 <sup>-3</sup> mmHg <sup>-1</sup> |                                                                 |
| Hypertension     | 1.32 <sub>[1.27,1.36]</sub> ( <i>p</i> =4.6×10 <sup>-55</sup> ) | 0.74 <sub>[0.70,0.78]</sub> ( <i>p</i> =6.6×10 <sup>-30</sup> )            | 1.20 <sub>[1.15,1.25]</sub> ( <i>p</i> =1.3×10 <sup>-19</sup> ) | 0.80 <sub>[0.76,0.84]</sub> ( <i>p</i> =6.6×10 <sup>-20</sup> )            |                                                                 |
| High cholesterol | 0.98 <sub>[0.94,1.02]</sub> ( <i>p</i> =0.375)                  | 0.92 <sub>[0.87,0.98]</sub> ( <i>p</i> =0.006)                             | 0.90 <sub>[0.85,0.94]</sub> ( <i>p</i> =2.9×10 <sup>-5</sup> )  | 0.94 <sub>[0.89,0.99]</sub> ( <i>p</i> =0.022)                             |                                                                 |
| Cardiac disease  | 1.07 <sub>[1.02,1.14]</sub> ( <i>p</i> =0.012)                  | 1.05 <sub>[0.98,1.11]</sub> ( <i>p</i> =0.164)                             | 0.93 <sub>[0.88,1.00]</sub> ( <i>p</i> =0.036)                  | 1.03 <sub>[0.97,1.10]</sub> ( <i>p</i> =0.332)                             |                                                                 |
| PVD              | 0.63 <sub>[0.39,1.03]</sub> ( <i>p</i> =0.065)                  | 1.03 <sub>[0.64,1.66]</sub> ( <i>p</i> =0.913)                             | 0.95 <sub>[0.59,1.52]</sub> ( <i>p</i> =0.836)                  | 1.24 <sub>[0.95,1.63]</sub> ( <i>p</i> =0.115)                             |                                                                 |
| Diabetes         | 0.79 <sub>[0.74,0.85]</sub> ( <i>p</i> =1.8×10 <sup>-10</sup> ) | 0.93 <sub>[0.86,1.01]</sub> ( <i>p</i> =0.080)                             | 0.71 <sub>[0.66,0.77]</sub> ( <i>p</i> =3.7×10 <sup>-17</sup> ) | 0.88 <sub>[0.81,0.96]</sub> ( <i>p</i> =0.005)                             |                                                                 |
| Stroke           | 0.98 <sub>[0.85,1.12]</sub> ( <i>p</i> =0.764)                  | 0.98 <sub>[0.83,1.15]</sub> ( <i>p</i> =0.762)                             | 0.93 <sub>[0.80,1.08]</sub> ( <i>p</i> =0.334)                  | 0.89 <sub>[0.74,1.07]</sub> ( <i>p</i> =0.201)                             |                                                                 |
| Asthma           | 0.95 <sub>[0.90,1.00]</sub> ( <i>p</i> =0.038)                  | 1.01 <sub>[0.96,1.06]</sub> ( <i>p</i> =0.724)                             | 0.89 <sub>[0.84,0.95]</sub> ( <i>p</i> =1.2×10 <sup>-4</sup> )  | 0.99 <sub>[0.94,1.04]</sub> ( <i>p</i> =0.600)                             |                                                                 |
| COPD             | 0.92 <sub>[0.76,1.10]</sub> ( <i>p</i> =0.357)                  | 1.04 <sub>[0.85,1.27]</sub> ( <i>p</i> =0.680)                             | 0.87 <sub>[0.71,1.07]</sub> ( <i>p</i> =0.182)                  | 1.10 <sub>[0.93,1.31]</sub> ( <i>p</i> =0.260)                             |                                                                 |
| Bronchitis       | 0.88 <sub>[0.79,0.98]</sub> ( <i>p</i> =0.025)                  | 0.96 <sub>[0.85,1.08]</sub> ( <i>p</i> =0.505)                             | 0.94 <sub>[0.83,1.06]</sub> ( <i>p</i> =0.304)                  | 0.99 <sub>[0.88,1.10]</sub> ( <i>p</i> =0.794)                             |                                                                 |
| Parkinson's      | 1.00 <sub>[0.71,1.42]</sub> ( <i>p</i> =0.997)                  | 0.88 <sub>[0.53,1.46]</sub> ( <i>p</i> =0.610)                             | 0.94 <sub>[0.64,1.39]</sub> ( <i>p</i> =0.770)                  | 1.04 <sub>[0.71,1.52]</sub> ( <i>p</i> =0.844)                             |                                                                 |
| Dementia         | 1.02 <sub>[0.55,1.91]</sub> ( <i>p</i> =0.944)                  | 0.58 <sub>[0.18,1.91]</sub> ( <i>p</i> =0.372)                             | 1.09 <sub>[0.55,2.16]</sub> ( <i>p</i> =0.803)                  | 0.58 <sub>[0.18,1.87]</sub> ( <i>p</i> =0.362)                             |                                                                 |
| Depression       | 0.97 <sub>[0.92,1.02]</sub> ( <i>p</i> =0.221)                  | 1.02 <sub>[0.97,1.07]</sub> ( <i>p</i> =0.519)                             | 0.96 <sub>[0.90,1.02]</sub> ( <i>p</i> =0.195)                  | 1.01 <sub>[0.96,1.06]</sub> ( <i>p</i> =0.614)                             |                                                                 |

**Supplementary Table 10. Associations of cardiac and aortic imaging phenotypes with common diseases.** The odds ratio of each imaging phenotype as a risk factor for a common disease as outcome is reported. Sex, age, weight and height were adjusted in logistic regression. n = 25,743 subjects were analysed with available disease information. The values are depicted as odds ratio [95% confidence interval] (two-sided t-test p-value).

| Structure | $-\log_{10}(p)$ | $r$   | Imaging phenotype    | Non-imaging phenotype                             | Field ID  |
|-----------|-----------------|-------|----------------------|---------------------------------------------------|-----------|
| LV        | 319.4           | 0.26  | LVM                  | Systolic blood pressure                           | 4080-2.0  |
|           | 307.7           | -0.33 | LVEDV                | Pulse rate                                        | 4194-2.0  |
|           | 226.5           | 0.22  | Wall thickness AHA 9 | Diastolic blood pressure                          | 4079-2.0  |
|           | 160.8           | 0.17  | LVEDV                | Number of days/week of vigorous physical activity | 904-2.0   |
|           | 69.8            | 0.11  | LVEDV                | Number of days/week of moderate physical activity | 884-2.0   |
| RV        | 307.7           | -0.33 | RVEDV                | Pulse rate                                        | 4194-2.0  |
|           | 180.0           | 0.18  | RVEDV                | Number of days/week of vigorous physical activity | 904-2.0   |
|           | 133.3           | 0.17  | RVEF                 | Systolic blood pressure                           | 4080-2.0  |
|           | 73.6            | -0.11 | RVEDV                | Overall health rating                             | 2178-2.0  |
|           | 70.0            | 0.11  | RVEDV                | Number of days/week of moderate physical activity | 884-2.0   |
| LA        | 307.7           | -0.25 | LAV max              | Pulse rate                                        | 4194-2.0  |
|           | 83.8            | 0.12  | LASV                 | Number of days/week of vigorous physical activity | 904-2.0   |
|           | 68.1            | 0.11  | LASV                 | Systolic blood pressure                           | 4080-0.0  |
|           | 33.9            | 0.08  | LASV                 | Number of days/week of moderate physical activity | 884-2.0   |
|           | 29.4            | -0.07 | LASV                 | Overall health rating                             | 2178-2.0  |
| RA        | 213.4           | -0.20 | RAV min              | Pulse rate                                        | 4194-2.0  |
|           | 82.0            | 0.12  | RAV min              | Number of days/week of vigorous physical activity | 904-2.0   |
|           | 45.4            | 0.10  | RAEF                 | Systolic blood pressure                           | 4080-2.0  |
|           | 41.7            | -0.12 | RAV min              | Types of physical activity in last 4 weeks        | 6164-0.2  |
|           | 36.7            | -0.08 | RAV max              | Overall health rating                             | 2178-0.0  |
| AAo       | 260.1           | 0.22  | AAo min area         | Diastolic blood pressure                          | 4079-0.0  |
|           | 128.5           | -0.18 | AAo distensibility   | Systolic blood pressure                           | 4080-2.0  |
|           | 46.2            | -0.11 | AAo distensibility   | Pulse rate                                        | 102-2.0   |
|           | 45.1            | 0.12  | AAo min area         | Birth weight                                      | 20022-0.0 |
|           | 37.5            | 0.08  | AAo max area         | Whole body fat mass                               | 23100-0.0 |
| DAo       | 167.6           | 0.19  | DAo min area         | Diastolic blood pressure                          | 4079-2.0  |
|           | 130.0           | -0.18 | DAo distensibility   | Systolic blood pressure                           | 4080-2.0  |
|           | 82.0            | -0.13 | DAo max area         | Pulse rate                                        | 102-0.1   |
|           | 64.3            | 0.11  | DAo max area         | Whole body fat mass                               | 23100-0.0 |
|           | 60.5            | 0.10  | DAo max area         | Hip circumference                                 | 49-0.0    |

**Supplementary Table 11. Five most significant PheWAS associations for each anatomical structure.** Note that if a non-imaging phenotype has multiple associations with imaging phenotypes of the same anatomical structure, only the top association is shown. For example, systolic blood pressure is significantly associated with several LV imaging phenotypes, including LVM, LVEDV, LVSV etc, but only the top association (lowest p-value) is shown, which is (LVM, Systolic blood pressure). Columns 2 and 3 denote the negative logarithm of correlation p-value (two-sided t-test) and Pearson's correlation coefficient  $r$ . Field ID denotes the UK Biobank code for the non-imaging phenotype.  $n = 26,893$  subjects were included in the analysis.



| Structure | $-\log_{10}(p)$ | $r$   | Imaging phenotype     | Non-imaging phenotype                                          | Field ID  |
|-----------|-----------------|-------|-----------------------|----------------------------------------------------------------|-----------|
| LV        | 13.4            | 0.05  | Wall thickness Global | Risk taking                                                    | 2040-2.0  |
|           | 11.1            | -0.04 | LVEDV                 | Happiness                                                      | 4526-2.0  |
|           | 8.7             | -0.04 | LVEDV                 | Neuroticism score                                              | 20127-0.0 |
|           | 8.3             | -0.04 | LVSV                  | Seen doctor (GP) for nerves, anxiety, tension or depression    | 2090-2.0  |
|           | 7.5             | -0.03 | LVEDV                 | Ever depressed for a whole week                                | 4598-2.0  |
| RV        | 16.5            | -0.06 | RVEDV                 | Neuroticism score                                              | 20127-0.0 |
|           | 13.6            | 0.05  | RVESV                 | Risk taking                                                    | 2040-2.0  |
|           | 12.1            | -0.05 | RVEDV                 | Frequency of depressed mood in last 2 weeks                    | 2050-0.0  |
|           | 10.7            | -0.04 | RVEDV                 | Happiness                                                      | 4526-2.0  |
|           | 9.0             | -0.04 | RVEDV                 | Seen doctor (GP) for nerves, anxiety, tension or depression    | 2090-0.0  |
| LA        | 10.5            | -0.04 | LAV max               | Happiness                                                      | 4526-2.0  |
|           | 10.2            | -0.04 | LASV                  | Frequency of depressed mood in last 2 weeks                    | 2050-2.0  |
|           | 6.8             | -0.04 | LASV                  | Neuroticism score                                              | 20127-0.0 |
|           | 6.4             | -0.03 | LASV                  | Seen a psychiatrist for nerves, anxiety, tension or depression | 2100-2.0  |
|           | 6.4             | -0.03 | LAEF                  | Risk taking                                                    | 2040-2.0  |
| RA        | 14.5            | -0.05 | RAEF                  | Risk taking                                                    | 2040-2.0  |
|           | 10.9            | -0.05 | RAV max               | Neuroticism score                                              | 20127-0.0 |
|           | 8.3             | -0.04 | RAV max               | Frequency of depressed mood in last 2 weeks                    | 2050-0.0  |
|           | 6.7             | -0.03 | RAV max               | Seen doctor (GP) for nerves, anxiety, tension or depression    | 2090-2.0  |
|           | 5.1             | -0.03 | RASV                  | Seen a psychiatrist for nerves, anxiety, tension or depression | 2100-0.0  |
| AAo       | 4.6             | 0.03  | AAo max area          | Risk taking                                                    | 2040-0.0  |
|           | 2.9             | 0.04  | AAo max area          | Substances taken for depression                                | 20546-0.1 |
|           | 1.9             | 0.05  | AAo max area          | Substances taken for anxiety                                   | 20549-0.1 |
|           | 1.6             | 0.03  | AAo distensibility    | Frequency of depressed mood in last 2 weeks                    | 2050-1.0  |
|           | 1.4             | 0.03  | AAo distensibility    | Ever depressed for a whole week                                | 4598-1.0  |
| DAo       | 5.4             | -0.03 | DAo max area          | Happiness                                                      | 4526-2.0  |
|           | 5.3             | 0.03  | DAo max area          | Risk taking                                                    | 2040-0.0  |
|           | 1.9             | -0.02 | DAo min area          | Ever depressed for a whole week                                | 4598-2.0  |
|           | 1.9             | 0.03  | DAo max area          | Substances taken for depression                                | 20546-0.1 |
|           | 1.9             | -0.02 | DAo max area          | Frequency of depressed mood in last 2 weeks                    | 2050-0.0  |

**Supplementary Table 12. Five most significant PheWAS associations in the mental health category for each anatomical structure.** Columns 2 and 3 denote the negative logarithm of correlation p-value (two-sided t-test) and Pearson's correlation coefficient  $r$ .  $n = 26,893$  subjects were included in the analysis.

| Structure | $-\log_{10}(p)$ | $r$   | Imaging phenotype  | Non-imaging phenotype                                                | Field ID  |
|-----------|-----------------|-------|--------------------|----------------------------------------------------------------------|-----------|
| LV        | 8.7             | -0.04 | $E_{cc}$ AHA 15    | Time to answer                                                       | 4288-2.0  |
|           | 7.9             | 0.04  | LVM                | Fluid intelligence score                                             | 20016-2.0 |
|           | 5.3             | -0.04 | $E_{ll}$ 3         | Time elapsed                                                         | 4256-2.1  |
|           | 5.0             | -0.04 | $E_{ll}$ 3         | Interval between previous point and current one in alphanumeric path | 6773-2.8  |
|           | 4.8             | -0.04 | $E_{ll}$ 3         | Time last key touched                                                | 4255-2.1  |
| RV        | 28.8            | 0.07  | RVESV              | Fluid intelligence score                                             | 20016-2.0 |
|           | 7.1             | -0.03 | RVEDV              | Duration to first press of snap-button in each round                 | 404-2.10  |
|           | 6.5             | -0.03 | RVEDV              | Mean time to correctly identify matches                              | 20023-2.0 |
|           | 6.4             | 0.04  | RVESV              | Number of puzzles correctly solved                                   | 6373-2.0  |
|           | 5.5             | 0.03  | RVEDV              | FI3 : word interpolation                                             | 4957-2.0  |
| LA        | 7.9             | 0.05  | LAV min            | Interval between previous point and current one in alphanumeric path | 6773-2.11 |
|           | 5.0             | 0.04  | LAV min            | Interval between previous point and current one in numeric path      | 6772-2.21 |
|           | 4.7             | 0.04  | LAV min            | Duration to complete alphanumeric path                               | 6350-2.0  |
|           | 4.4             | 0.03  | LAV min            | Duration to first press of snap-button in each round                 | 404-2.7   |
|           | 4.3             | 0.03  | LAV min            | Time elapsed                                                         | 4256-2.2  |
| RA        | 18.8            | 0.06  | RAV max            | Fluid intelligence score                                             | 20016-2.0 |
|           | 6.1             | 0.04  | RAV min            | Maximum digits remembered correctly                                  | 4282-2.0  |
|           | 5.7             | 0.04  | RAV min            | Number of rounds of numeric memory test performed                    | 4283-2.0  |
|           | 4.5             | 0.04  | RAV max            | Value entered                                                        | 6312-2.6  |
|           | 4.2             | 0.04  | RAV max            | Number of puzzles correctly solved                                   | 6373-2.0  |
| AAo       | 2.8             | 0.03  | AAo max area       | Total errors traversing alphanumeric path                            | 6351-2.0  |
|           | 2.5             | 0.03  | AAo max area       | Interval between previous point and current one in alphanumeric path | 6773-2.0  |
|           | 2.4             | 0.02  | AAo max area       | Time to complete round                                               | 400-2.3   |
|           | 2.3             | -0.03 | AAo distensibility | Duration to first press of snap-button in each round                 | 404-0.3   |
|           | 2.2             | 0.02  | AAo max area       | Time last key touched                                                | 4255-2.0  |
| DAo       | 5.2             | 0.04  | DAo min area       | Total errors traversing alphanumeric path                            | 6351-2.0  |
|           | 5.0             | -0.04 | DAo min area       | Number of puzzles correctly solved                                   | 6373-2.0  |
|           | 3.3             | -0.03 | DAo min area       | Number of symbol digit matches made correctly                        | 23324-2.0 |
|           | 3.3             | 0.03  | DAo max area       | Interval between previous point and current one in alphanumeric path | 6773-2.0  |
|           | 3.1             | 0.02  | DAo min area       | Mean time to correctly identify matches                              | 20023-0.0 |

**Supplementary Table 13. Five most significant PheWAS associations in the cognitive function category for each anatomical structure.** Columns 2 and 3 denote the negative logarithm of correlation p-value (two-sided t-test) and Pearson's correlation coefficient  $r$ .  $n = 26,893$  subjects were included in the analysis.

|                          | LVM (g)                                                | LVEDV (mL)                                              | LVEF (%)                                             | RVEDV (mL)                                             | RVEF (%)                                  |
|--------------------------|--------------------------------------------------------|---------------------------------------------------------|------------------------------------------------------|--------------------------------------------------------|-------------------------------------------|
| Birth weight, per 0.6 kg | 0.5 <sub>[0.3,0.7]</sub> ( $p=1.4 \times 10^{-5}$ )    | 1.0 <sub>[0.6,1.5]</sub> ( $p=7.5 \times 10^{-7}$ )     | 0.1 <sub>[-0.0,0.2]</sub> ( $p=0.090$ )              | 1.8 <sub>[1.3,2.2]</sub> ( $p=7.4 \times 10^{-15}$ )   | -0.1 <sub>[-0.2,-0.0]</sub> ( $p=0.013$ ) |
|                          | LAV max (mL)                                           | LAEF (%)                                                | RAV max (mL)                                         | RAEF (%)                                               |                                           |
| Birth weight, per 0.6 kg | -0.7 <sub>[-1.0,-0.3]</sub> ( $p=4.3 \times 10^{-4}$ ) | 0.4 <sub>[0.2,0.5]</sub> ( $p=2.5 \times 10^{-6}$ )     | 1.7 <sub>[1.2,2.1]</sub> ( $p=2.2 \times 10^{-14}$ ) | 0.2 <sub>[0.0,0.4]</sub> ( $p=0.011$ )                 |                                           |
|                          | AAo max area (mm <sup>2</sup> )                        | AAo distensibility                                      | DAo max area (mm <sup>2</sup> )                      | DAo distensibility                                     |                                           |
| Birth weight, per 0.6 kg | 20.2 <sub>[17.3,23.2]</sub> ( $p=10^{-40}$ )           | -0.04 <sub>[-0.1,-0.0]</sub> ( $p=8.8 \times 10^{-4}$ ) | 7.1 <sub>[5.8,8.5]</sub> ( $p=3.2 \times 10^{-26}$ ) | -0.1 <sub>[-0.1,-0.0]</sub> ( $p=5.5 \times 10^{-4}$ ) |                                           |

**Supplementary Table 14. Associations of cardiac and aortic imaging phenotypes with birth weight.** Sex, age, sex \* age, weight, height, SBP, DBP, current smoking status, alcohol intake, vigorous PA frequency, high cholesterol and diabetes were adjusted in regression.  $n = 12,169$  subjects were analysed with available information for all independent variables. The values are depicted as regression coefficient  $\beta$  [95% confidence interval] (two-sided t-test p-value).

|                            | LVM (g)                                                     | LVEDV (mL)                                     | LVEF (%)                                                       | RVEDV (mL)                                                     | RVEF (%)                                                       |
|----------------------------|-------------------------------------------------------------|------------------------------------------------|----------------------------------------------------------------|----------------------------------------------------------------|----------------------------------------------------------------|
| Risk taking                | 1.0 <sub>[0.6,1.4]</sub> ( <i>p</i> =4.4×10 <sup>-6</sup> ) | 0.02 <sub>[-0.8,0.8]</sub> ( <i>p</i> =0.962)  | -0.3 <sub>[-0.5,-0.1]</sub> ( <i>p</i> =0.004)                 | 0.2 <sub>[-0.7,1.0]</sub> ( <i>p</i> =0.724)                   | -0.5 <sub>[-0.7,-0.3]</sub> ( <i>p</i> =1.6×10 <sup>-7</sup> ) |
| Neuroticism score, per 3.2 | -0.03 <sub>[-0.2,0.2]</sub> ( <i>p</i> =0.744)              | -0.6 <sub>[-0.9,-0.2]</sub> ( <i>p</i> =0.002) | 0.1 <sub>[-0.0,0.2]</sub> ( <i>p</i> =0.129)                   | -1.0 <sub>[-1.3,-0.6]</sub> ( <i>p</i> =9.8×10 <sup>-7</sup> ) | 0.1 <sub>[0.0,0.2]</sub> ( <i>p</i> =0.019)                    |
|                            | LAV max (mL)                                                | LAEF (%)                                       | RAV max (mL)                                                   | RAEF (%)                                                       |                                                                |
| Risk taking                | -0.3 <sub>[-1.0,0.5]</sub> ( <i>p</i> =0.489)               | -0.5 <sub>[-0.8,-0.2]</sub> ( <i>p</i> =0.001) | 0.8 <sub>[-0.0,1.6]</sub> ( <i>p</i> =0.063)                   | -0.8 <sub>[-1.1,-0.5]</sub> ( <i>p</i> =5.3×10 <sup>-7</sup> ) |                                                                |
| Neuroticism score, per 3.2 | -0.4 <sub>[-0.7,-0.1]</sub> ( <i>p</i> =0.023)              | -0.04 <sub>[-0.2,0.1]</sub> ( <i>p</i> =0.585) | -0.7 <sub>[-1.0,-0.3]</sub> ( <i>p</i> =3.7×10 <sup>-4</sup> ) | 0.05 <sub>[-0.1,0.2]</sub> ( <i>p</i> =0.477)                  |                                                                |
|                            | AAo max area (mm <sup>2</sup> )                             | AAo distensibility                             | DAo max area (mm <sup>2</sup> )                                | DAo distensibility                                             |                                                                |
| Risk taking                | 5.4 <sub>[-0.3,11.1]</sub> ( <i>p</i> =0.064)               | -0.01 <sub>[-0.1,0.0]</sub> ( <i>p</i> =0.553) | 1.5 <sub>[-1.0,4.1]</sub> ( <i>p</i> =0.242)                   | 0.02 <sub>[-0.0,0.1]</sub> ( <i>p</i> =0.462)                  |                                                                |
| Neuroticism score, per 3.2 | 1.1 <sub>[-1.4,3.7]</sub> ( <i>p</i> =0.380)                | -0.01 <sub>[-0.0,0.0]</sub> ( <i>p</i> =0.391) | -0.3 <sub>[-1.5,0.8]</sub> ( <i>p</i> =0.572)                  | -0.01 <sub>[-0.0,0.0]</sub> ( <i>p</i> =0.658)                 |                                                                |

**Supplementary Table 15. Associations of cardiac and aortic imaging phenotypes with mental health measures.** Sex, age, sex \* age, weight, height, SBP, DBP, current smoking status, alcohol intake, vigorous PA frequency, high cholesterol and diabetes were adjusted in regression. n = 16,568 subjects were analysed with available information for all independent variables. The values are depicted as regression coefficient  $\beta$  [95% confidence interval] (two-sided t-test p-value). Risk taking is a binary variable, with 0 denoting no and 1 denoting yes. Neuroticism score ranges from 0 to 12.

|                             | LVM (g)                                                      | LVEDV (mL)                                                   | LVEF (%)                                                     | RVEDV (mL)                                                 | RVEF (%)                                                        |
|-----------------------------|--------------------------------------------------------------|--------------------------------------------------------------|--------------------------------------------------------------|------------------------------------------------------------|-----------------------------------------------------------------|
| Fluid intelligence, per 2.1 | 0.8 <sub>[0.6,0.9]</sub> ( <i>p</i> =1.8×10 <sup>-18</sup> ) | 1.1 <sub>[0.7,1.4]</sub> ( <i>p</i> =3.3×10 <sup>-10</sup> ) | -0.1 <sub>[-0.2,-0.0]</sub> ( <i>p</i> =0.033)               | 2.0 <sub>[1.6,2.3]</sub> ( <i>p</i> =2×10 <sup>-26</sup> ) | -0.3 <sub>[-0.3,-0.2]</sub> ( <i>p</i> =3.9×10 <sup>-10</sup> ) |
|                             | LAV max (mL)                                                 | LAEF (%)                                                     | RAV max (mL)                                                 | RAEF (%)                                                   |                                                                 |
| Fluid intelligence, per 2.1 | 0.1 <sub>[-0.2,0.4]</sub> ( <i>p</i> =0.553)                 | -0.01 <sub>[-0.1,0.1]</sub> ( <i>p</i> =0.879)               | 1.6 <sub>[1.3,2.0]</sub> ( <i>p</i> =1.9×10 <sup>-20</sup> ) | -0.2 <sub>[-0.3,-0.0]</sub> ( <i>p</i> =0.013)             |                                                                 |
|                             | AAo max area (mm <sup>2</sup> )                              | AAo distensibility                                           | DAo max area (mm <sup>2</sup> )                              | DAo distensibility                                         |                                                                 |
| Fluid intelligence, per 2.1 | 3.1 <sub>[0.7,5.4]</sub> ( <i>p</i> =0.012)                  | -0.01 <sub>[-0.0,0.0]</sub> ( <i>p</i> =0.194)               | 0.7 <sub>[-0.4,1.8]</sub> ( <i>p</i> =0.208)                 | 0.00 <sub>[-0.0,0.0]</sub> ( <i>p</i> =0.926)              |                                                                 |

**Supplementary Table 16. Associations of cardiac and aortic imaging phenotypes with fluid intelligence score.** Sex, age, sex \* age, weight, height, SBP, DBP, current smoking status, alcohol intake, vigorous PA frequency, high cholesterol and diabetes are adjusted in regression. n = 18,369 subjects were analysed with available information for all independent variables. The values are depicted as regression coefficient  $\beta$  [95% confidence interval] (two-sided t-test p-value). Fluid intelligence score ranges from 0 to 13.

| Risk factor        | Data source                          | Cohorts                                                                                |
|--------------------|--------------------------------------|----------------------------------------------------------------------------------------|
| SBP                | Evangelou et al, 2018 <sup>73</sup>  | UK Biobank (n = 458,577) + ICBP (n = 299,024) + MVP (n = 220,520) + EGCUT (n = 28,742) |
| Diabetes           | Morris et al, 2012 <sup>74</sup>     | DIAGRAM (n = 12,171 cases, n = 56,862 controls)                                        |
| Birth weight       | Warrington et al, 2019 <sup>75</sup> | EGG (n = 80,745) + UK Biobank (n = 217,397)                                            |
| Risk tolerance     | Linner et al, 2019 <sup>76</sup>     | UK Biobank (n = 431,126) + 10 replication cohorts (n = 35,445)                         |
| Fluid intelligence | Davies et al, 2011 <sup>77</sup>     | CAGES (n = 3,511)                                                                      |

**Supplementary Table 17. Data sources for the genetic associations of risk factors of interest.** ICBP: International Consortium of Blood Pressure Genome Wide Association Studies; MVP: Million Veteran Program; EGCUT, Estonian Genome Center, University of Tartu; DIAGRAM: DIABetes Genetics Replication and Meta-analysis; EGG: Early Growth Genetics; CAGES: Cognitive Ageing Genetics in England and Scotland.

|                                 | Risk factor                 | Observational analysis                                    | Mendelian randomisation                               |                                            |                                              |
|---------------------------------|-----------------------------|-----------------------------------------------------------|-------------------------------------------------------|--------------------------------------------|----------------------------------------------|
|                                 |                             |                                                           | IVW                                                   | WM                                         | MR-Egger                                     |
| LVM (g)                         | SBP, per 18.0 mmHg          | 4.8 <sub>[4.6,5.1]</sub> ( $p=10^{-324}$ )                | 4.8 <sub>[1.4,8.2]</sub> ( $p=0.006$ )                | 4.6 <sub>[0.1,9.0]</sub> ( $p=0.044$ )     | 11.7 <sub>[-1.5,24.9]</sub> ( $p=0.085$ )    |
|                                 | Diabetes                    | -1.0 <sub>[-1.8,-0.1]</sub> ( $p=0.025$ )                 | -0.3 <sub>[-1.2,0.6]</sub> ( $p=0.499$ )              | -0.3 <sub>[-1.3,0.7]</sub> ( $p=0.539$ )   | -0.02 <sub>[-5.4,5.3]</sub> ( $p=0.995$ )    |
|                                 | Birth weight, per 0.6 kg    | 0.5 <sub>[0.3,0.7]</sub> ( $p=1.4\times 10^{-5}$ )        | 1.2 <sub>[0.5,1.9]</sub> ( $p=0.001$ )                | 1.0 <sub>[0.0,2.1]</sub> ( $p=0.049$ )     | 1.8 <sub>[-0.2,3.7]</sub> ( $p=0.078$ )      |
|                                 | Risk taking                 | 1.0 <sub>[0.6,1.4]</sub> ( $p=4.4\times 10^{-6}$ )        | 2.4 <sub>[-1.5,6.3]</sub> ( $p=0.233$ )               | 3.8 <sub>[-2.0,9.5]</sub> ( $p=0.196$ )    | 11.1 <sub>[-5.3,27.5]</sub> ( $p=0.196$ )    |
|                                 | Fluid intelligence, per 2.1 | 0.8 <sub>[0.6,0.9]</sub> ( $p=1.8\times 10^{-18}$ )       | 0.1 <sub>[-1.1,1.4]</sub> ( $p=0.825$ )               | 0.2 <sub>[-1.4,1.8]</sub> ( $p=0.820$ )    | -1.6 <sub>[-7.3,4.2]</sub> ( $p=0.601$ )     |
| LVEDV (mL)                      | SBP, per 18.0 mmHg          | 5.8 <sub>[5.3,6.3]</sub> ( $p=2.4\times 10^{-130}$ )      | 0.8 <sub>[-4.8,6.5]</sub> ( $p=0.771$ )               | -3.5 <sub>[-11.0,3.9]</sub> ( $p=0.355$ )  | -5.5 <sub>[-27.1,16.1]</sub> ( $p=0.617$ )   |
|                                 | Diabetes                    | -8.7 <sub>[-10.3,-7.0]</sub> ( $p=1.4\times 10^{-24}$ )   | -0.7 <sub>[-2.1,0.8]</sub> ( $p=0.382$ )              | -0.9 <sub>[-2.5,0.8]</sub> ( $p=0.311$ )   | -2.4 <sub>[-11.3,6.5]</sub> ( $p=0.615$ )    |
|                                 | Birth weight, per 0.6 kg    | 1.0 <sub>[0.6,1.5]</sub> ( $p=7.5\times 10^{-7}$ )        | 2.4 <sub>[1.1,3.6]</sub> ( $p=1.5\times 10^{-4}$ )    | 1.9 <sub>[0.2,3.6]</sub> ( $p=0.031$ )     | 3.0 <sub>[-0.3,6.4]</sub> ( $p=0.079$ )      |
|                                 | Risk taking                 | 0.02 <sub>[-0.8,0.8]</sub> ( $p=0.962$ )                  | 1.2 <sub>[-5.5,7.9]</sub> ( $p=0.725$ )               | 3.8 <sub>[-6.1,13.8]</sub> ( $p=0.452$ )   | 14.3 <sub>[-13.9,42.6]</sub> ( $p=0.328$ )   |
|                                 | Fluid intelligence, per 2.1 | 1.1 <sub>[0.7,1.4]</sub> ( $p=3.3\times 10^{-10}$ )       | 0.3 <sub>[-1.8,2.4]</sub> ( $p=0.769$ )               | 0.3 <sub>[-2.5,3.2]</sub> ( $p=0.816$ )    | -1.3 <sub>[-11.2,8.6]</sub> ( $p=0.806$ )    |
| LVEF (%)                        | SBP, per 18.0 mmHg          | 0.9 <sub>[0.8,1.0]</sub> ( $p=4.9\times 10^{-49}$ )       | 0.2 <sub>[-1.1,1.5]</sub> ( $p=0.757$ )               | 0.4 <sub>[-1.3,2.1]</sub> ( $p=0.665$ )    | 2.6 <sub>[-2.4,7.7]</sub> ( $p=0.309$ )      |
|                                 | Diabetes                    | -1.0 <sub>[-1.4,-0.5]</sub> ( $p=5.1\times 10^{-6}$ )     | -0.2 <sub>[-0.5,0.1]</sub> ( $p=0.165$ )              | -0.3 <sub>[-0.6,0.1]</sub> ( $p=0.116$ )   | -0.8 <sub>[-2.3,0.7]</sub> ( $p=0.342$ )     |
|                                 | Birth weight, per 0.6 kg    | 0.1 <sub>[-0.0,0.2]</sub> ( $p=0.090$ )                   | 0.2 <sub>[-0.0,0.5]</sub> ( $p=0.080$ )               | 0.2 <sub>[-0.2,0.6]</sub> ( $p=0.258$ )    | -0.1 <sub>[-0.8,0.7]</sub> ( $p=0.863$ )     |
|                                 | Risk taking                 | -0.3 <sub>[-0.5,-0.1]</sub> ( $p=0.004$ )                 | 0.5 <sub>[-1.3,2.2]</sub> ( $p=0.618$ )               | 0.4 <sub>[-2.1,2.8]</sub> ( $p=0.773$ )    | 0.9 <sub>[-6.7,8.4]</sub> ( $p=0.827$ )      |
|                                 | Fluid intelligence, per 2.1 | -0.1 <sub>[-0.2,-0.0]</sub> ( $p=0.033$ )                 | 0.2 <sub>[-0.3,0.7]</sub> ( $p=0.364$ )               | 0.2 <sub>[-0.5,0.8]</sub> ( $p=0.575$ )    | 1.3 <sub>[-1.0,3.6]</sub> ( $p=0.288$ )      |
| RVEDV (mL)                      | SBP, per 18.0 mmHg          | 3.0 <sub>[2.5,3.5]</sub> ( $p=4.8\times 10^{-32}$ )       | 0.04 <sub>[-5.8,5.9]</sub> ( $p=0.988$ )              | 0.4 <sub>[-7.5,8.4]</sub> ( $p=0.916$ )    | 9.0 <sub>[-13.6,31.5]</sub> ( $p=0.439$ )    |
|                                 | Diabetes                    | -11.1 <sub>[-12.9,-9.3]</sub> ( $p=3.4\times 10^{-34}$ )  | -1.6 <sub>[-3.0,-0.3]</sub> ( $p=0.016$ )             | -1.8 <sub>[-3.5,-0.1]</sub> ( $p=0.036$ )  | 2.3 <sub>[-4.9,9.5]</sub> ( $p=0.549$ )      |
|                                 | Birth weight, per 0.6 kg    | 1.8 <sub>[1.3,2.2]</sub> ( $p=7.4\times 10^{-15}$ )       | 3.2 <sub>[1.8,4.5]</sub> ( $p=3.2\times 10^{-6}$ )    | 2.8 <sub>[1.0,4.6]</sub> ( $p=0.002$ )     | 4.3 <sub>[0.6,7.9]</sub> ( $p=0.023$ )       |
|                                 | Risk taking                 | 0.2 <sub>[-0.7,1.0]</sub> ( $p=0.724$ )                   | 3.1 <sub>[-4.3,10.6]</sub> ( $p=0.407$ )              | -0.5 <sub>[-10.8,9.8]</sub> ( $p=0.919$ )  | 15.2 <sub>[-16.2,46.5]</sub> ( $p=0.350$ )   |
|                                 | Fluid intelligence, per 2.1 | 2.0 <sub>[1.6,2.3]</sub> ( $p=2\times 10^{-26}$ )         | 0.1 <sub>[-2.0,2.3]</sub> ( $p=0.894$ )               | 0.4 <sub>[-2.7,3.5]</sub> ( $p=0.811$ )    | -2.3 <sub>[-12.9,8.2]</sub> ( $p=0.675$ )    |
| RVEF (%)                        | SBP, per 18.0 mmHg          | 1.6 <sub>[1.5,1.7]</sub> ( $p=1.4\times 10^{-161}$ )      | 0.9 <sub>[-0.5,2.2]</sub> ( $p=0.222$ )               | -0.3 <sub>[-2.0,1.4]</sub> ( $p=0.742$ )   | 0.4 <sub>[-4.8,5.7]</sub> ( $p=0.877$ )      |
|                                 | Diabetes                    | -0.7 <sub>[-1.1,-0.3]</sub> ( $p=5\times 10^{-4}$ )       | -0.1 <sub>[-0.5,0.2]</sub> ( $p=0.543$ )              | 0.04 <sub>[-0.3,0.4]</sub> ( $p=0.850$ )   | -0.5 <sub>[-2.7,1.6]</sub> ( $p=0.629$ )     |
|                                 | Birth weight, per 0.6 kg    | -0.1 <sub>[-0.2,-0.0]</sub> ( $p=0.013$ )                 | -0.1 <sub>[-0.4,0.2]</sub> ( $p=0.458$ )              | -0.1 <sub>[-0.4,0.3]</sub> ( $p=0.790$ )   | -0.7 <sub>[-1.5,0.1]</sub> ( $p=0.070$ )     |
|                                 | Risk taking                 | -0.5 <sub>[-0.7,-0.3]</sub> ( $p=1.6\times 10^{-7}$ )     | -0.1 <sub>[-1.6,1.5]</sub> ( $p=0.946$ )              | 0.2 <sub>[-2.1,2.5]</sub> ( $p=0.883$ )    | 0.1 <sub>[-6.5,6.6]</sub> ( $p=0.979$ )      |
|                                 | Fluid intelligence, per 2.1 | -0.3 <sub>[-0.3,-0.2]</sub> ( $p=3.9\times 10^{-10}$ )    | 0.1 <sub>[-0.3,0.6]</sub> ( $p=0.581$ )               | 0.2 <sub>[-0.5,0.9]</sub> ( $p=0.611$ )    | 2.3 <sub>[0.0,4.6]</sub> ( $p=0.063$ )       |
| AAo max area (mm <sup>2</sup> ) | SBP, per 18.0 mmHg          | -13.5 <sub>[-16.8,-10.2]</sub> ( $p=1.2\times 10^{-15}$ ) | 32.3 <sub>[-5.4,69.9]</sub> ( $p=0.093$ )             | 49.3 <sub>[-4.4,103.0]</sub> ( $p=0.072$ ) | 60.3 <sub>[-83.8,204.3]</sub> ( $p=0.415$ )  |
|                                 | Diabetes                    | -19.7 <sub>[-31.5,-7.9]</sub> ( $p=0.001$ )               | -12.0 <sub>[-20.0,-4.0]</sub> ( $p=0.003$ )           | -10.2 <sub>[-20.5,0.1]</sub> ( $p=0.051$ ) | -19.1 <sub>[-64.0,25.8]</sub> ( $p=0.429$ )  |
|                                 | Birth weight, per 0.6 kg    | 20.2 <sub>[17.3,23.2]</sub> ( $p=10^{-40}$ )              | 25.1 <sub>[16.0,34.2]</sub> ( $p=6.2\times 10^{-8}$ ) | 19.5 <sub>[7.6,31.5]</sub> ( $p=0.001$ )   | 14.9 <sub>[-10.2,39.9]</sub> ( $p=0.246$ )   |
|                                 | Risk taking                 | 5.4 <sub>[-0.3,11.1]</sub> ( $p=0.064$ )                  | 15.2 <sub>[-39.1,69.5]</sub> ( $p=0.582$ )            | 24.9 <sub>[-48.4,98.2]</sub> ( $p=0.505$ ) | 152.2 <sub>[-71.9,376.4]</sub> ( $p=0.194$ ) |
|                                 | Fluid intelligence, per 2.1 | 3.1 <sub>[0.7,5.4]</sub> ( $p=0.012$ )                    | 3.0 <sub>[-13.9,20.0]</sub> ( $p=0.724$ )             | 6.5 <sub>[-14.1,27.1]</sub> ( $p=0.538$ )  | -17.8 <sub>[-99.7,64.1]</sub> ( $p=0.676$ )  |
| AAo distensibility              | SBP, per 18.0 mmHg          | -0.2 <sub>[-0.2,-0.2]</sub> ( $p=1.1\times 10^{-41}$ )    | -0.3 <sub>[-0.6,-0.0]</sub> ( $p=0.042$ )             | -0.4 <sub>[-0.8,-0.0]</sub> ( $p=0.048$ )  | -1.0 <sub>[-2.1,0.0]</sub> ( $p=0.062$ )     |
|                                 | Diabetes                    | 0.00 <sub>[-0.1,0.1]</sub> ( $p=0.991$ )                  | -0.1 <sub>[-0.2,-0.0]</sub> ( $p=0.001$ )             | -0.1 <sub>[-0.2,-0.0]</sub> ( $p=0.014$ )  | -0.2 <sub>[-0.5,0.1]</sub> ( $p=0.297$ )     |
|                                 | Birth weight, per 0.6 kg    | -0.04 <sub>[-0.1,-0.0]</sub> ( $p=8.8\times 10^{-4}$ )    | -0.03 <sub>[-0.1,0.0]</sub> ( $p=0.269$ )             | 0.01 <sub>[-0.1,0.1]</sub> ( $p=0.898$ )   | 0.1 <sub>[-0.0,0.3]</sub> ( $p=0.058$ )      |
|                                 | Risk taking                 | -0.01 <sub>[-0.1,0.0]</sub> ( $p=0.553$ )                 | 0.1 <sub>[-0.3,0.5]</sub> ( $p=0.591$ )               | -0.2 <sub>[-0.7,0.3]</sub> ( $p=0.439$ )   | -0.00 <sub>[-1.5,1.5]</sub> ( $p=0.995$ )    |
|                                 | Fluid intelligence, per 2.1 | -0.01 <sub>[-0.0,0.0]</sub> ( $p=0.194$ )                 | -0.1 <sub>[-0.2,0.1]</sub> ( $p=0.449$ )              | -0.03 <sub>[-0.2,0.1]</sub> ( $p=0.756$ )  | 0.2 <sub>[-0.4,0.9]</sub> ( $p=0.490$ )      |

**Supplementary Table 18. Effects of risk factors on cardiac and aortic imaging phenotypes by Mendelian randomisation analysis, compared to observational analysis.** For Mendelian randomisation, three methods were used, including inverse-variance weighting (IVW), weighted median (WM) and MR-Egger. Sex, age, height and genetic principal components were adjusted.  $n = 22,229$  subjects were analysed with available genetic information. Observational analysis results come from previously reported tables in this paper. The values are depicted as regression coefficient  $\beta$  [95% confidence interval] (two-sided t-test p-value). The Bonferroni threshold for multiple comparison (5 risk factors and 7 imaging phenotypes) is  $p_{Bonf} = 1.4 \times 10^{-3}$  for  $\alpha = 0.05$ .
